# Supplementary material for: Change in potential snowfall phenology: past, present, and future in Chinese Tianshan mountainous region, Central Asia
Source: Copernicus journal article supplement (doi:10.5194/tc-2022-244), 2022-12-08
Supplement: Supplementary file [file tc-2022-244-AC2-supplement.pdf]

## Referee#2

### General comments:

The manuscript by Li et al. mainly investigated the changes in potential snowfall phenology for the past, present, and future periods in Tianshan, China. They defined three potential snowfall season metrics based on temperature data. Although the definition of potential snowfall phenology is interesting, the hydrological meaning of these metrics is questionable. The methodology of the study was not clearly described. The results lack a strict validation. The credibility of the study needs to be further improved.

Reply: Thanks for your good comments and suggestion, in particular, for your recognition of defining potential snowfall phenology. Snowfall is a solid phase of precipitation affects the ecological environment and hydrological processes in mountainous areas and an important water resource (Barnett et al., 2005; Jonas et al., 2008; Bai et al., 2019). One of the most prominent impacts of climate warming has been a shift from snow to rain in temperate and cold regions across the globe (Knowles et al., 2006; Trenberth, 2011; Jennings and Molotch, 2019). In this context, the snowfall season will inevitably be cut down. Inspired by definitions of vegetation phenology and snow cover phenology (Lu et al., 2006; Piao et al., 2008; Da Silva et al., 2015; Dahlin et al., 2015; Thackeray et al. 2016; Wang et al. 2016; Li et al., 2017; Zhang et al., 2022), we defined potential snowfall phenology and employed three indicators, start of potential snowfall season (SPSS), the end of potential snowfall season (EPSS), and the length of potential snowfall season (LPSS), to identify the possible onset, end, and duration of snowfall. The advancing or delaying of SPSS means potential snowfall comes earlier or later in late-autumn or early-winter, which affect accumulation and storing of solid water resource as snow cover. Likewise, the advancing or delaying of EPSS indicates potential snowfall ends earlier or later in late-winter or early-spring, which is likely to influence the snow-melting, snow albedo, and runoff yield and concentration in mountainous areas such as the Chinese Tianshan mountainous region (CTMR). Above all, the potential snowfall phenology has hydrological significance in snow-dominated region. The the motivation and methodology of the study were not clearly described, we will revise it in the revised manuscript. Besides, in **4.1 Performance of PSP indicators**, our work showed the potential snowfall season was able to cover the observed one, which partially validated our results. we will add more detailed validation in the revised manuscript. Related references are as followed:

Da, Silva, A., Valcu, M., Kempenaers, B.: Light pollution alters the phenology of dawn and dusk singing in common European songbirds, *Phil. Trans. R. Soc. B.*, 370, 1-9, <https://doi.org/10.1098/rstb.2014.0126>, 2015.

Dahlin, K., Fisher, R., and Lawrence, P.: Environmental drivers of drought deciduous phenology in the Community Land Model, *Biogeosciences*, 12, 5061-5074, <https://doi.org/10.5194/bg-12-5061-2015>, 2015.

Lu, P., Yu, Q., Liu, J., Lee, X.: Advance of tree-flowering dates in response to urban climate change, *Agr. Forest Meteorol.*, 138, 120-131, <https://doi.org/10.1016/j.agrformet.2006.04.002>, 2006.

Piao, S., Ciais, P., Friedlingstein, P., Peylin, P., Reichstein, M., Luysaert, S., Margolis, H., Fang, J., Barr, A., Chen, A., Grelle, A., Hollinger, D., Laurila, T., Lindroth, A., Richardson, A., Vesala, T.: Net carbon dioxide losses of northern ecosystems in response to autumn warming, *Nature*, 451, 49-52, <https://doi.org/10.1038/nature06444>, 2008.

Wang, X., Wang, S., Hang, Y., Peng, Y.: Snow phenology variability in the Qinghai-Tibetan Plateau and its response to climate change during 2002-2012, *J. Geo-Infor. Sci.*, 18, 1573-1579, 2016. (in Chinese with English abstract)

Li, X., Zhou, Y., Asrar, G. R., Lin, M.: Characterizing spatiotemporal dynamics in phenology of urban ecosystems based on Landsat data, *Sci. Total. Environ.*, 605, 721-734, <https://doi.org/10.1016/j.scitotenv.2017.06.245>, 2017.

Thackeray, S., Henrys, P., Hemming, D., Bell, J., Botham, M., Burthe, S., Helaouet, P., Johns, D., Johns, D., Jones, I., Leech, D., Mackay, E., Massimino, D., Atkinson, S., Bacon, P., Brereton, T., Carvalho, L., Clutton-Brock, T., Duck, C., Edwards, M., Elliott, J., Hall, S., Harrington, R., Pearce-Higgins, J., Høye, T., Kruuk, L., Pemberton, J., Sparks, T., Thompson, P., White, I., Winfield, I., Wanless, S.: Phenological sensitivity to climate across taxa and trophic levels, *Nature*, 535, 241-245, <https://doi.org/10.1038/nature18608>, 2016.

Zhang, B., Li, X., Li, C., Nyiransengiyumva, C., Qin, Q.: Alpine vegetation responses to snow phenology in the Chinese Tianshan mountainous region, *J. Mt. Sci-Engl.*, 19, 1307-1323, <https://doi.org/10.1007/s11629-021-7133-4>, 2022.

Knowles, N., Dettinger, M., and Cayan, D.: Trends in snowfall versus rainfall in the western United States, *J. Climate*, 19, 4545-4559, <https://doi.org/10.1175/JCLI3850.1>, 2006.

Trenberth, K., E.: Changes in precipitation with climate change, *Clim. Res.*, 47, 123-128, <https://doi.org/10.3354/cr00953>, 2011.

Barnett, T., Adam, J., and Lettenmaier, D.: Potential impacts of a warming climate on water availability in snow-dominated regions, *Nature*, 438, 303-309, <https://doi.org/10.1038/nature04141>, 2005.

Jonas, T., Rixen, C., Sturm, M., Stoeckli, V.: How alpine plant growth is linked to snow cover and climate variability, *J. Geophys. Res.*, 113, 377, G03013, <https://doi.org/10.1029/2007JG000680>, 2008.

#### Specific comments and replies:

1. Introduction. The authors failed to well justify the motivation of the study. For example, what is the significance of predicting "potential snowfall phenology"? The start of potential snowfall season (SPSS) does not mean there is a snowfall. Even there may be no any snow during an entire "potential snowfall season". Thus, it may have no any effect on the water and energy balance of a region. In my opinion, the named metrics of "potential snow phenology" here only reflect the fluctuations of temperature, and they have limited hydrological significance.

Description on the modification: Thanks very much for your good comments. We did fail to show the significance of predicting "potential snowfall phenology". In fact, the start of potential snowfall season (SPSS) means possible onset of snowfall and snowfall is not guaranteed. We don't think no any snowfall occur during an entire "potential snowfall season" in the snow-dominated region such as the CTMR. Just like potential evapotranspiration (PET), it can reflect the energy required to evaporate water, effective wind that can carry water vapor from the surface to the lower atmosphere and other factors, can be a comprehensive reflection of a region's evaporation capacity (<https://baike.so.com/doc/4035668-4233412.html>). We believe potential snowfall season can reflect comprehensively intra-annual fluctuation of air temperature, timing allocation and capacity of snowfall, as well as water and energy balance in a region. Because if potential snowfall season becomes shorter,

the potential rainfall season will expand. Potential water and energy needed by snowfall will change accordingly. We'll take it all into consideration if we have the chance to revise.

2. The methodology is quite unclear. For example, the authors should provide more details of the calculation process of RST, as it is critical for this study. What data were you used to calculate RST? Did you validate the accuracy of the RST results? If RST is calculated based on a long-term probability statistic of snowfall/rainfall, why is it reasonable to calculate RST at an annual scale? Besides, precipitation phase partitioning is challenging in technique, as temperature humidity, and pressure jointly determine whether precipitation falls as snow/rain (Jennings et al., 2018). If the authors cannot prove the robustness and high accuracy of the RST calculation method for this region, I do not think the results of potential snow phenology are credible. Jennings, K.S., Winchell, T.S., Livneh, B. et al. Spatial variation of the rain-snow temperature threshold across the Northern Hemisphere. *Nat Commun* 9, 1148 (2018). <https://doi.org/10.1038/s41467-018-03629-7>

Description on the modification: thanks for your good suggestion. We did not provide more details of the calculation process of RST for it is the preliminary work from our team and we cited it in the submitted manuscript (Zhang et al, 2017). In the China, including the CTMR, after 1980, the precipitation phase is not labelled (Ding et al., 2014). Visual observer reports of daily precipitation phase are available from 26 meteorological stations across the CTMR during 1950s-1979 (number of records = **237115**). Whereas, records from only 20 meteorological stations across the CTMR were used in the work from Jennings et al. (2018), and total number of records was **15535**. Although values of rain-snow threshold (RST) or proportions are not included in the observational data, we used the daily precipitation phase data to calculate RSTs based on the frequency intersection method and the probability guarantee method (Zhang et al, 2017). Exactly, precipitation phase partitioning is challenging in technique for temperature, humidity, and pressure jointly determining whether precipitation falls as snow/rain (Jennings et al., 2018). simulation of RSTs were not involved in our work, so precipitation phase partitioning did not affect robustness and high accuracy of our RSTs. Related references are as followed:

Ding, B., Yang, K., Qin, J., Wang, L., Chen, Y. and He, X.: The dependence of precipitation types on surface elevation and meteorological conditions and its parameterization. *J. Hydro.*, 513, 154-163, <https://doi.org/10.1016/j.jhydrol.2014.03.038>, 2014.

Zhang, X., Li, X., Gao, P., Li, Q., and Tang, H.: Separation of precipitation forms based on different methods in Tianshan Mountainous Area, Northwest China, *J. Glaciol. Geocryol.*, 39, 235-244, 2017 (in Chinese with English abstract).

Jennings, K. S., Winchell, T. S., Livneh, B., Molotch N. P.: Spatial variation of the rain - snow temperature threshold across the Northern Hemisphere, *Nat. Commun.*, 9, 1 - 9, <https://doi.org/10.1038/s41467-018-03629-7>, 2018.

3. L176-181. The authors indicated that they interpolated the model data to stations and then applied a bias correction method to improve the results. However, the interpolated results shown in the maps (Fig. 3, 5, & 7-10) still show large spatial biases. For example, many metrics show

obvious circular changes around some stations. These maps do not well reflect the real spatial variations of these variables. The big errors of the results further reduce the value of the study.

Description on the modification: Thank you very much for your good suggestion. We will check the bias correction method and then revise maps in the revised manuscript.

4. L430-432. The estimated changes in potential snowfall season metrics fall in big variation ranges (e.g., 1-27 days). Is it induced by the large uncertainties of the prediction models or different changes among the stations? If it is because of the former, are these results that have so large uncertainties really meaningful?

Description on the modification: Thank you very much for your good suggestion. The variation ranges (e.g., 1-27 days) during the observed period (1961-2017/2020) were big for different warming rates across the CTMR. It was calculated based on the observed data from meteorological stations had no connection with the prediction models.

Technical Points:

1. Table 2. Please change resolution to degree x degree.

Description on the modification: Thank you very much for your good suggestion. We will revise Table 2 as suggested in the revised manuscript.

2. Fig. 2. Please add values for the y-axis.

Description on the modification: Thank you very much for your good suggestion. We will revise Fig. 2 as suggested in the revised manuscript.

3 Fig. 3. Why are Fig. 3b and 3c have the same spatial distribution? Please recheck your data and results. I would suggest classifying the metrics of SPSS, EPSS, and LPSS into a number of categories, instead of using continuous color bars, which reduces the readability of the figures. Besides, please add units for the legends.

Description on the modification: Thank you very much for your good suggestion. We will revise all figures as suggested in the revised manuscript.

4 Fig. 5, 7-10. Same to Fig. 3, it would be better to classify the metrics of SPSS, EPSS, and LPSS into a number of categories from low to high. Please also add units for the legends. What are the significance levels of the trends? Are these trends significant?

Description on the modification: Thank you very much for your good suggestion. The significance level is 0.05 and these trends are significant. We will revise all figures including Fig. 5, 7-10 as suggested and provide details about significance levels in the revised manuscript.

5 Fig. 6 & 11. The confidence intervals and error bars should be added into these figures.

Description on the modification: Thank you very much for your good suggestion. We will revise Fig. 6 & 11 as suggested in the revised manuscript.
